# Supplementary material for: Discovery of a junctional epitope antibody that stabilizes IL-6 and gp80 protein:protein interaction and modulates its downstream signaling
Source: PubMed Central journal article supplement (PMC5278397; doi:10.1038/srep37716), 2017-01-30
Supplement: srep37716-s1.pdf [file srep37716-s1.pdf]

# SUPPLEMENTARY INFORMATION (SI) FIGURES AND TABLES

**Title: Discovery of a junctional epitope antibody that stabilizes IL-6 and gp80 protein:protein interaction and modulates its downstream signaling**

**Authors:** Ralph Adams<sup>1,#</sup>, Rebecca J. Burnley<sup>1,#</sup>, Chiara R. Valenzano<sup>1,#</sup>, Omar Qureshi<sup>1</sup>, Carl Doyle<sup>1</sup>, Simon Lumb<sup>1</sup>, Maria del Carmen Lopez<sup>1,^</sup>, Robert Griffin<sup>1</sup>, David McMillan<sup>1</sup>, Richard D. Taylor<sup>1</sup>, Chris Meier<sup>1</sup>, Prashant Mori<sup>1</sup>, Laura M. Griffin<sup>1</sup>, Ulrich Wernery<sup>2</sup>, Jörg Kinne<sup>2</sup>, Stephen Rapecki<sup>1</sup>, Terry S. Baker<sup>1</sup>, Alastair D. G. Lawson<sup>1</sup>, Michael Wright<sup>1</sup>, and Anna Ettore<sup>1,\*</sup>

**Affiliations:** <sup>1</sup>New Medicines, UCB-Celltech, 208 Bath Road, SL1 3WE, Slough UK; <sup>2</sup>Central Veterinary Research Laboratory, P.O.Box 597, Dubai, United Arab Emirates.

# These authors contributed equally to the work; \* corresponding author.

**SI Figure 1**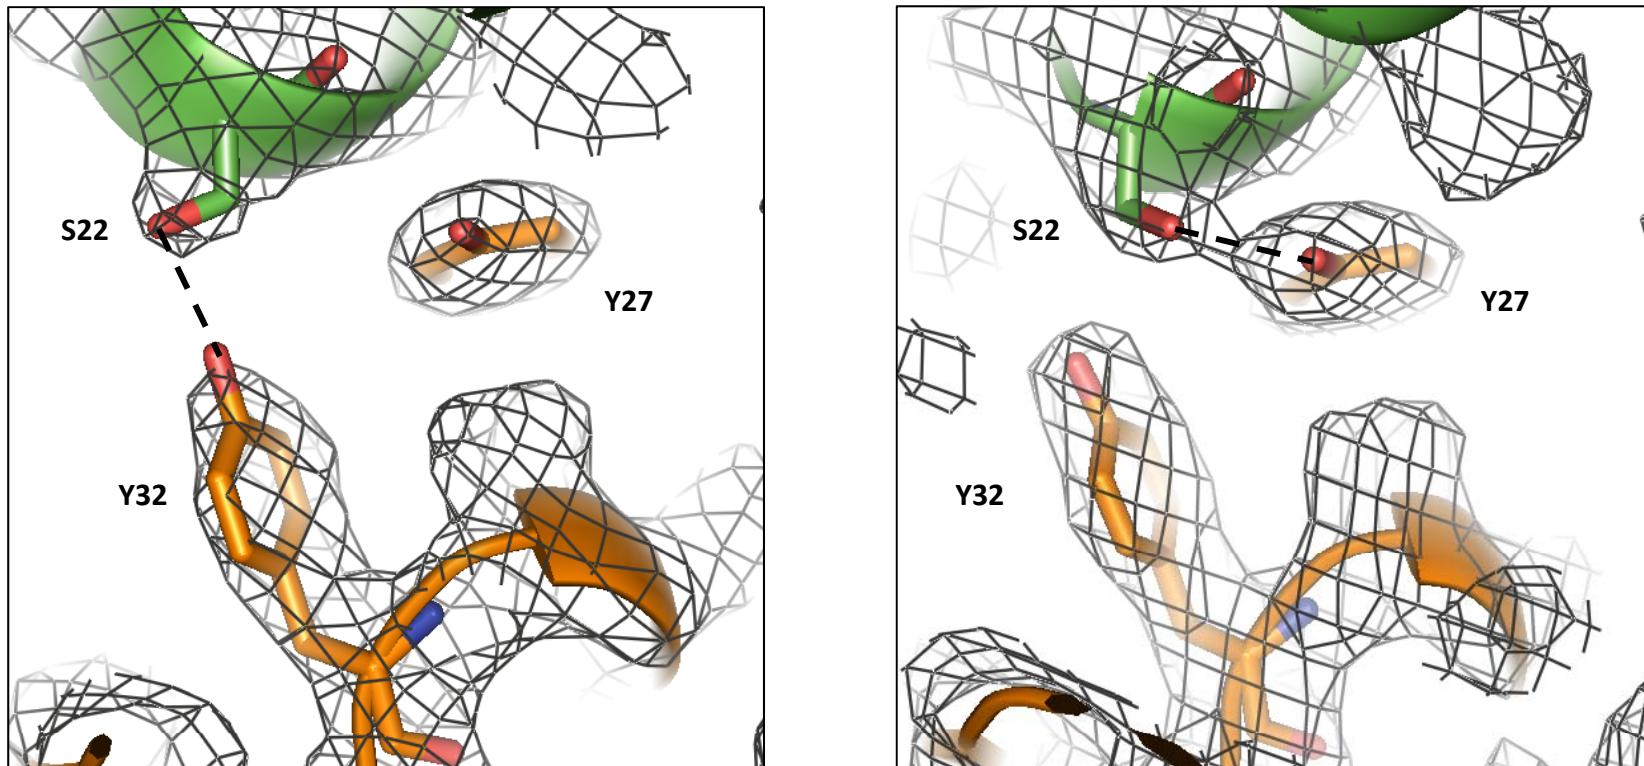**SI Figure 1. Differential hydrogen bonding in the two copies of the crystallographic asymmetric unit.**

There are two copies of the VHH6–IL-6–gp80 complex in the crystallographic asymmetric unit. In one copy, IL-6 (green) residue Ser22 forms a hydrogen bond with VHH6 (orange) residue Tyr32 (left), and in the second copy, Ser22 forms a hydrogen bond with VHH6 residue Tyr27 (right).

SI Figure 2

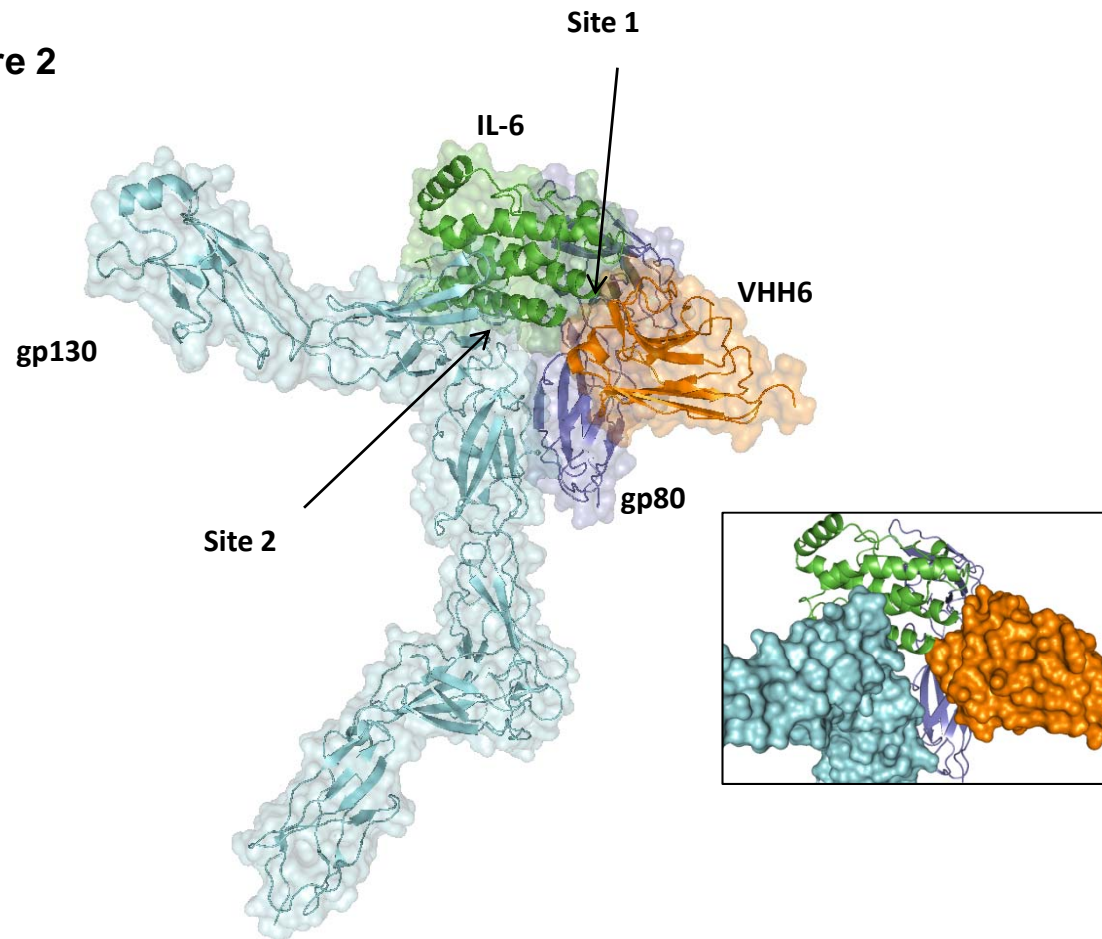

**SI Figure 2. Model of crystal structure of VHH6–IL-6–gp80 superimposed with gp130.**

Superimposition of IL-6 (green) and gp80 (blue) from the signaling complex, IL-6–gp80–gp130 (PDB code 1P9M), showed low r.m.s.d. values of  $1.4 \pm 0.2$  Å and  $1.35 \pm 0.05$  Å respectively, indicating that VHH6 (orange) holds IL-6 and gp80 together in a form able to bind gp130 (cyan).

SI Figure 3

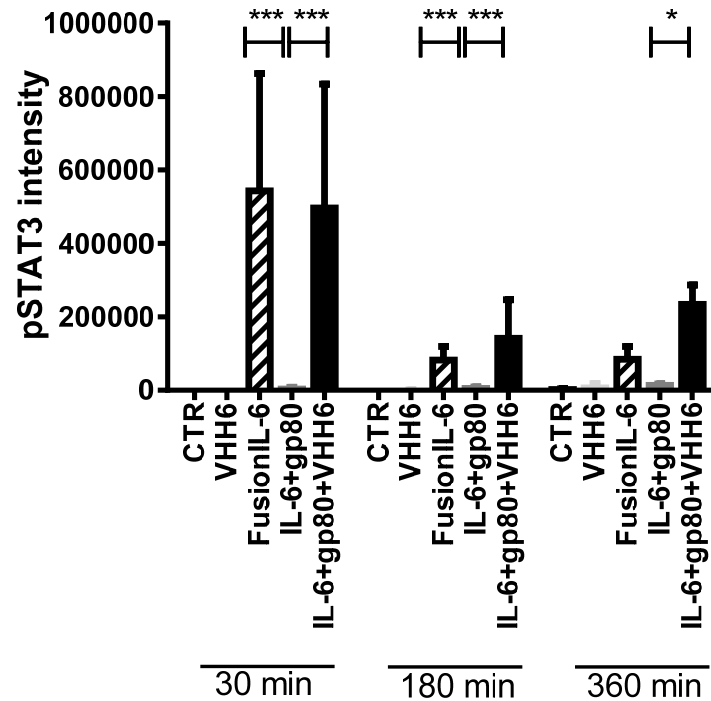

**SI Figure 3. Stabilization of the IL-6–gp80 complex by VHH6 promotes higher and sustained STAT3 phosphorylation signal in HUVECs comparable to FusionIL-6 fusion protein.**

HUVECs were treated with FusionIL-6, IL-6+gp80 and VHH6+IL-6+gp80 as described in Materials and Methods. STAT3 phosphorylation signal was quantified at different time points using the “spot total intensity per object” parameter as described in Materials and Methods. Statistical analysis of pSTAT3 signal from three replicates was performed for each time point (statistical significance:  $*=p\leq 0.05$ ;  $**=p\leq 0.01$  and  $***=p\leq 0.001$ ). Unlike IL-6+gp80, in the presence of VHH6 or when FusionIL-6 was added to the culture, pSTAT3 was increased at earlier (30 min) and later time points (180 min and 360 min). y-axis: pSTAT3 fluorescence expressed as spot total intensity per object; x-axis: time (min).

## SI Figure 4

### SI Figure 4. Transcriptomic analysis of HUVECs treated with VHH6+IL-6+gp80 confirms selective up-regulation of pro-inflammatory genes.

Three different batches of HUVECs were analyzed at 30, 180 and 360 min. VHH6+IL-6+gp80 (sample) were compared to IL-6+gp80 (control). Data were analyzed using the RT<sup>2</sup> Profiler PCR array web based data analysis template v3.5 (<http://pcrdataanalysis.sabiosciences.com/pcr/arrayanalysis>) and changes in gene expression changes were calculated using the  $\Delta\Delta C_t$  method with normalization of the raw data to housekeeping genes. A heat map was generated using Genedata's Analyst software. Genes in grey-black are down-regulated, while genes in yellow are up-regulated. Gene regulation for each sample is expressed as fold change compared to control.

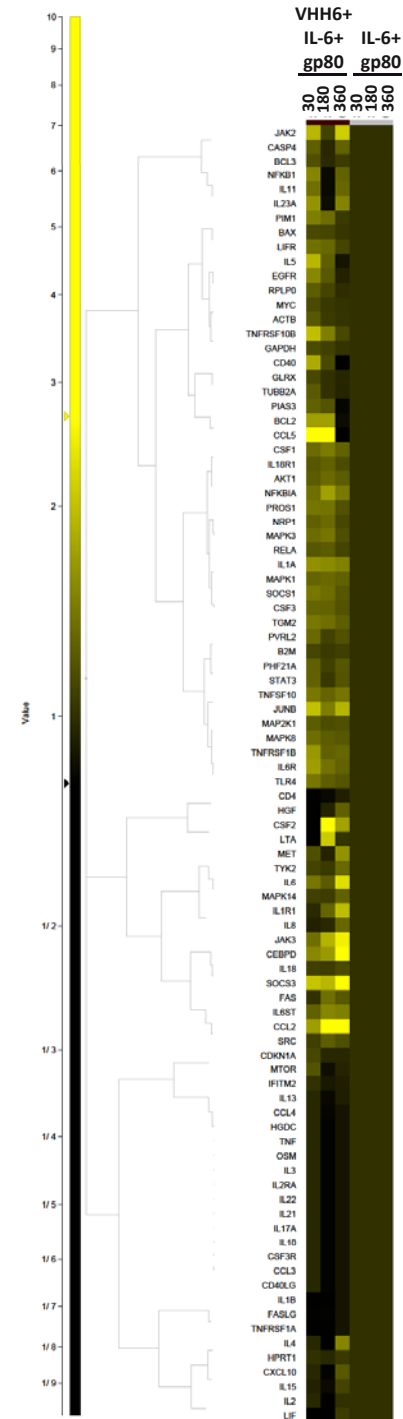

## SI Table 1

Table 1A: Data collection and refinement statistics (molecular replacement)

|                                                     | Junctional Epitope<br>Antibody in complex with<br>IL-6 and gp80 |
|-----------------------------------------------------|-----------------------------------------------------------------|
| Data collection                                     |                                                                 |
| <b>Space group</b>                                  | C 1 2 1                                                         |
| <b>Cell dimensions</b>                              |                                                                 |
| <i>a, b, c</i> (Å)                                  | 249.03, 67.80, 78.16                                            |
| $\alpha, \beta, \gamma$ (°)                         | 90.00, 104.53, 90.00                                            |
| <b>Resolution (Å)</b>                               | 47.84-2.70(2.86-2.69)*                                          |
| <i>R</i> <sub>meas</sub> (%)                        | 7.2(50.1)                                                       |
| <i>CC</i> <sub>1/2</sub> (%)                        | 99.9(91.5)                                                      |
| <i>I</i> / $\sigma$ <i>I</i>                        | 20.88(3.97)                                                     |
| <b>Completeness (%)</b>                             | 99.4(96.9)                                                      |
| <b>Redundancy</b>                                   | 7.5(7.5)                                                        |
| Refinement                                          |                                                                 |
| <b>Resolution (Å)</b>                               | 20.00-2.70                                                      |
| <b>No. reflections</b>                              | 34,870                                                          |
| <i>R</i> <sub>work</sub> / <i>R</i> <sub>free</sub> | 0.2313/0.2872                                                   |
| <b>No. atoms</b>                                    |                                                                 |
| <b>Protein</b>                                      | 7590                                                            |
| <b>Water</b>                                        | 111                                                             |
| <b>B-factors</b>                                    |                                                                 |
| <b>Protein</b>                                      | 56.33                                                           |
| <b>Water</b>                                        | 43.19                                                           |
| <b>R.m.s. deviations</b>                            |                                                                 |
| <b>Bond lengths (Å)</b>                             | 0.007                                                           |
| <b>Bond angles (°)</b>                              | 1.289                                                           |

\*Values in parentheses are for highest-resolution shell.

**SI Table 1B: Single mutants of VHH6**

|        | <i>kd</i> (1/s) |
|--------|-----------------|
| wtVHH6 | 3.6E-04         |
| N74A   | 1.5E-04         |
| K113A  | 2.6E-04         |
| Y32A   | 3.0E-04         |
| S101A  | 3.9E-04         |
| Y27A   | 7.0E-04         |

**SI Table 1C: Double mutants of VHH6**

|             | <i>kd</i> (1/s) |
|-------------|-----------------|
| wtVHH6      | 3.6E-04         |
| Y27A Y32A   | 4.3E-04         |
| N74A S101A  | 13.5E-04        |
| K113A S101A | 14.3E-04        |
| K113S S101A | 16.4E-04        |

**SI Table 1. Additional data supporting the junctional epitope nature of VHH6.**

**(A)** Data collection and refinement statistics (molecular replacement). To assess the contributions of the side chains to binding, alanine-scanning was carried out. The dissociation rate of single **(B)** and double mutants **(C)** were assessed using SPR.

SI Table 2: Peptides identified and quantified in IL-6 and gp80 by HDX-MS

SI Table 2A: Peptide identified in IL-6

| Start Residue | End Residue | Sequence                     | 2 timepoints with p<0.01 | 4 timepoints with p<0.01 |
|---------------|-------------|------------------------------|--------------------------|--------------------------|
| 0             | 11          | APVPPGEDSKDV                 |                          |                          |
| 3             | 23          | PPGEDSKDVAAPHRQPLTSSE        |                          |                          |
| 21            | 28          | SSERIDKQ                     | *                        |                          |
| 21            | 31          | SSERIDKQIRY                  | *                        |                          |
| 22            | 31          | SERIDKQIRY                   | *                        |                          |
| 24            | 33          | RIDKQIRYIL                   | *                        | *                        |
| 25            | 36          | IDKQIRYILDGI                 | *                        | *                        |
| 29            | 39          | IRYILDGISAL                  |                          |                          |
| 38            | 49          | ALRKETCNKSNM                 | #                        |                          |
| 39            | 49          | LRKETCNKSNM                  | #                        |                          |
| 40            | 49          | RKETCNKSNM                   | #                        |                          |
| 40            | 51          | RKETCNKSNMCE                 |                          |                          |
| 41            | 61          | KETCNKSNMCESSKEALAENN        | #                        |                          |
| 42            | 56          | ETCNKSNMCESSKEA              |                          |                          |
| 52            | 75          | SSKEALAENNLNLPKMAEKDGCF<br>Q |                          |                          |
| 53            | 63          | SKEALAENNLN                  |                          |                          |
| 53            | 75          | SKEALAENNLNLPKMAEKDGCFQ      |                          |                          |
| 55            | 65          | EALAENNLNLP                  |                          |                          |
| 58            | 67          | AENNLNLPKM                   |                          |                          |
| 58            | 74          | AENNLNLPKMAEKDGCF            | *                        | *                        |
| 59            | 80          | ENNLNLPKMAEKDGCFQSGFNE       | *                        |                          |
| 60            | 67          | NNLNLPKM                     |                          |                          |
| 60            | 70          | NNLNLPKMAEK                  |                          |                          |
| 60            | 82          | NNLNLPKMAEKDGCFQSGFNEET      | *                        |                          |
| 68            | 74          | AEKDGCF                      | *                        | *                        |
| 70            | 81          | KDGCFQSGFNEE                 | *                        |                          |
| 75            | 84          | QSGFNEETCL                   |                          |                          |
| 85            | 92          | VKIITGLL                     |                          |                          |
| 85            | 93          | VKIITGLLE                    |                          |                          |
| 87            | 93          | IITGLLE                      |                          |                          |
| 98            | 108         | LEYLQNRFEES                  |                          |                          |
| 99            | 109         | EYLQNRFESSE                  |                          |                          |
| 99            | 110         | EYLQNRFESSEE                 |                          |                          |
| 99            | 112         | EYLQNRFESSEEQEA              |                          |                          |



---

|            |     |                        |   |   |
|------------|-----|------------------------|---|---|
| <b>99</b>  | 120 | EYLQNRFESSEEQARAVQMSTK |   |   |
| <b>100</b> | 110 | YLQNRFESSEE            |   |   |
| <b>100</b> | 112 | YLQNRFESSEEQA          |   |   |
| <b>104</b> | 114 | RFESSEEQARA            |   |   |
| <b>106</b> | 112 | ESSEEQA                |   |   |
| <b>106</b> | 116 | ESSEEQARAVQ            |   |   |
| <b>109</b> | 116 | EEQARAVQ               |   |   |
| <b>115</b> | 122 | VQMSTKVL               |   |   |
| <b>115</b> | 122 | VQMSTKVL               |   |   |
| <b>120</b> | 126 | KVLIQFL                |   |   |
| <b>123</b> | 135 | IQFLQKKAKNLDA          |   |   |
| <b>126</b> | 133 | LQKKAKNL               | * |   |
| <b>126</b> | 135 | LQKKAKNLDA             | * |   |
| <b>126</b> | 144 | LQKKAKNLDAITTPDPTTN    | * |   |
| <b>126</b> | 145 | LQKKAKNLDAITTPDPTTNA   |   |   |
| <b>126</b> | 147 | LQKKAKNLDAITTPDPTTNASL | * |   |
| <b>129</b> | 143 | KAKNLDAITTPDPTT        |   |   |
| <b>136</b> | 147 | ITTPDPTTNASL           | * | * |
| <b>148</b> | 155 | LTKLQAQN               |   |   |
| <b>148</b> | 155 | LTKLQAQN               |   |   |
| <b>148</b> | 158 | LTKLQAQNQWL            |   |   |
| <b>148</b> | 160 | LTKLQAQNQWLQD          |   |   |
| <b>152</b> | 158 | QAQNQWL                |   |   |
| <b>159</b> | 165 | QDMTTHL                | * |   |
| <b>159</b> | 167 | QDMTTHLIL              | * |   |
| <b>161</b> | 167 | MTTHLIL                | * |   |
| <b>166</b> | 172 | ILRSFKE                | * | * |
| <b>166</b> | 173 | ILRSFKEF               | * | * |
| <b>166</b> | 174 | ILRSFKEFL              | * |   |
| <b>168</b> | 174 | RSFKEFL                | * | * |
| <b>168</b> | 178 | RSFKEFLQSSL            | * | * |

---

SI Table 2B: SI Table 2A: Peptide identified in gp80

| Start Residue | End Residue | Sequence               | 2 timepoints with p<0.01 | 4 timepoints with p<0.01 |
|---------------|-------------|------------------------|--------------------------|--------------------------|
| 66            | 86          | HENLYFQGLAPRRCPAQEVAR  |                          |                          |
| 73            | 82          | GLAPRRCPAQ             |                          |                          |
| 73            | 83          | GLAPRRCPAQE            | *                        |                          |
| 73            | 85          | GLAPRRCPAQEVA          | *                        |                          |
| 78            | 96          | RCPAQEVARGAGAGDVPPE    |                          |                          |
| 81            | 102         | AQEVARGAGAGDVPPEEPQLSC | *                        |                          |
| 82            | 95          | QEVARGAGAGDVPP         |                          |                          |
| 83            | 94          | EVARGAGAGDVP           | *                        |                          |
| 84            | 100         | VARGAGAGDVPPEEPQL      | *                        |                          |
| 86            | 100         | RGAGAGDVPPEEPQL        | *                        |                          |
| 92            | 110         | DVPPEEPQLSCFRKSPLSN    | *                        |                          |
| 94            | 100         | PPEEPQL                |                          |                          |
| 103           | 111         | FRKSPLSNV              |                          |                          |
| 105           | 123         | KSPLSNVVCEWGPRSTPSL    |                          |                          |
| 111           | 123         | VVCEWGPRSTPSL          |                          |                          |
| 112           | 123         | VCEWGPRSTPSL           |                          |                          |
| 115           | 129         | WGPRSTPSLTTKAVL        |                          |                          |
| 124           | 130         | TTKAVLL                |                          |                          |
| 130           | 141         | LVRKFQNSPAED           |                          |                          |
| 131           | 141         | VRKFQNSPAED            |                          |                          |
| 135           | 145         | QNSPAEDFQEP            |                          |                          |
| 139           | 158         | AEDFQEPQYQSQESQKFSCQ   |                          |                          |
| 141           | 147         | DFQEPQ                 |                          |                          |
| 146           | 164         | CQYSQESQKFSCQLAVPEG    |                          |                          |
| 147           | 164         | QYSQESQKFSCQLAVPEG     |                          |                          |
| 148           | 158         | YSQESQKFSCQ            |                          |                          |
| 152           | 158         | SQKFSCQ                |                          |                          |
| 157           | 170         | CQLAVPEGDSSFYI         |                          |                          |
| 159           | 168         | LAVPEGDSSF             | *                        |                          |
| 162           | 168         | PEGDSSF                | *                        |                          |
| 174           | 183         | CVASSVGSKF             |                          |                          |
| 176           | 183         | ASSVGSKF               |                          |                          |
| 195           | 205         | LQPDPPANITV            | *                        |                          |
| 201           | 210         | ANITVTAVAR             |                          |                          |
| 206           | 216         | TAVARNPRWLS            | *                        |                          |
| 207           | 214         | AVARNPRW               |                          |                          |
| 208           | 214         | VARNPRW                |                          |                          |
| 208           | 217         | VARNPRWLSV             | *                        |                          |

|            |     |                         |   |   |
|------------|-----|-------------------------|---|---|
| <b>208</b> | 218 | VARNPRWLSVT             | * |   |
| <b>218</b> | 229 | TWQDPHSWNSSF            | * |   |
| <b>221</b> | 229 | DPHSWNSSF               |   |   |
| <b>230</b> | 236 | YRLRFEL                 |   |   |
| <b>235</b> | 245 | ELRYRAERSKT             |   |   |
| <b>237</b> | 245 | RYRAERSKT               |   |   |
| <b>243</b> | 256 | SKTFTTWVMKDLQH          | * | * |
| <b>250</b> | 262 | MVKDLQHHAVIDH           | * |   |
| <b>250</b> | 266 | MVKDLQHHAVIDAWSG        | * | * |
| <b>250</b> | 273 | MVKDLQHHAVIDAWSGLRHVVQL | * |   |
| <b>265</b> | 273 | SGLRHVVQL               |   |   |
| <b>267</b> | 273 | LRHVVQL                 |   |   |
| <b>268</b> | 275 | RHVVQLRA                |   |   |
| <b>274</b> | 283 | RAQEFGQGE               | * | * |
| <b>274</b> | 284 | RAQEFGQGEW              | * | * |
| <b>274</b> | 286 | RAQEFGQGEWSE            | * | * |
| <b>277</b> | 295 | EEFGQGEWSEWSPEAMGTP     |   |   |
| <b>280</b> | 296 | GQGEWSEWSPEAMGTPW       |   |   |
| <b>284</b> | 291 | WSEWSPEA                | * |   |
| <b>284</b> | 298 | WSEWSPEAMGTPWTE         |   |   |
| <b>284</b> | 303 | WSEWSPEAMGTPWTESRSP     |   |   |
| <b>285</b> | 291 | SEWSPEA                 |   |   |
| <b>285</b> | 298 | SEWSPEAMGTPWTE          |   |   |
| <b>285</b> | 303 | SEWSPEAMGTPWTESRSP      |   |   |
| <b>287</b> | 298 | WSPEAMGTPWTE            |   |   |
| <b>289</b> | 303 | PEAMGTPWTESRSP          |   |   |
| <b>292</b> | 298 | MGTPWTE                 |   |   |

### SI Table 2: Additional data supporting HDX-MS.

List of peptides identified in IL-6 (**A**) and gp80 (**B**) and quantified by HDX-MS. Asterisk (\*) indicates deuterium uptake increasing the presence of VHH6; hash (#) indicates deuterium uptake decreasing in the presence of VHH6.

**SI Table 3: SPR analysis**

| IL-6 immobilized      | <i>kd</i> (1/s) | SE ( <i>kd</i> ) | KD (M)   | SE (KD)  |
|-----------------------|-----------------|------------------|----------|----------|
| gp80                  | 0.046           | 5.40E-05         | 3.42E-08 | 7.20E-09 |
| gp80+VHH6 (2 $\mu$ M) | 1.94E-04        | 1.90E-07         | NA       |          |

  

| gp80 immobilized      | <i>kd</i> (1/s) | SE ( <i>kd</i> ) | KD (M)   | SE (KD)  |
|-----------------------|-----------------|------------------|----------|----------|
| IL-6                  | 0.048           | 4.70E-05         | 1.54E-08 | 1.50E-09 |
| IL-6+VHH6 (2 $\mu$ M) | 2.10E-04        | 2.80E-07         | NA       |          |

  

| VHH6 immobilized      | <i>kd</i> (1/s) | SE ( <i>kd</i> ) | KD (M) |
|-----------------------|-----------------|------------------|--------|
| IL-6+gp80 (2 $\mu$ M) | 3.09E-04        | 4.40E-07         | NA     |
| gp80+IL-6 (2 $\mu$ M) | 3.75E-04        | 6.00E-07         | NA     |

  

| gp130 immobilized                          | <i>ka</i> (1/Ms)    | <i>kd</i> (1/s) |
|--------------------------------------------|---------------------|-----------------|
| gp80 [IL-6 (2 $\mu$ M)]                    | 3.6 10 <sup>5</sup> | 0.037           |
| gp80 [IL-6 (2 $\mu$ M)+VHH6 (2 $\mu$ M)]   | 4.7 10 <sup>5</sup> | 0.029           |
| IL-6 [gp80 (2 $\mu$ M)]                    | 3.6 10 <sup>5</sup> | 0.035           |
| IL-6 [gp80 (2 $\mu$ M) + VHH6 (2 $\mu$ M)] | 4.4 10 <sup>5</sup> | 0.036           |

**SI Table 3: Additional SPR data analysis.**

During SPR studies binding of IL-6, gp80 and VHH6 were individually tested in a concentration series (0-250 nM, as two-fold serial dilution). When proteins were tested in combinations (IL-6 and gp80, IL-6 and VHH6, gp80 and VHH6, gp80 and IL-6 and VHH6) one of the proteins was titrated in a concentration series (0-250 nM), while the other was kept constant at an excess concentration of 2  $\mu$ M (in brackets) to ensure complex formation. A total of four proteins were immobilized on the chip, from top to bottom: IL-6, gp80, VHH6 and gp130.

**SI Table 4: In-house constructs**

| <b>Construct</b>                       | <b>Expression Host</b> | <b>Promoter</b> | <b>Affinity Tag</b>                | <b>Expressed Protein</b>                    |
|----------------------------------------|------------------------|-----------------|------------------------------------|---------------------------------------------|
| <b>pNAFL-8His-fusionIL-6(gp80D123)</b> | CHO                    | CMV             | 8His                               | gp80(L20-S320)(C211A, C277A)-IL-6(V30-M212) |
| <b>pNAFL-gp80D123-hscFc</b>            | CHO                    | CMV             | Single chain human IgG Fc fragment | gp80(M1-P322)(C211A, C277A)-hscFc           |
| <b>pNAFL-8His-gp80V4</b>               | CHO                    | CMV             | 8His                               | gp80V4                                      |
| <b>pTrx-6His-hIL-6</b>                 | <i>E.coli</i>          | T7              | Thioredoxin-6His                   | Trx-6His-IL-6(A28-M212)                     |
| <b>pTrx-6His-IL-6(S21)</b>             | <i>E.coli</i>          | T7              | Thioredoxin-6His                   | Trx-6His-IL-6(S49-M212)                     |
| <b>pIMMs-6His-VHH6</b>                 | Expi-HEK               | CMV             | 6His                               | VHH6-6His                                   |

**SI Table 4: In-house designed constructs.**

All constructs listed in the table were designed in-house to support the immunization campaign, antibody screening, junctional antibody characterization and biophysics analysis.
